# Supplementary material for: Electrostatic lateral interactions drive ESCRT-III heteropolymer assembly
Source: eLife. 2019 Jun 27;8:e46207. doi: 10.7554/eLife.46207 (PMC6663469; doi:10.7554/eLife.46207)
Supplement: Figure 1—source data 1. [file elife-46207-fig1-data1.xlsx]

## Sheet: Sheet1
%MVB sorting
Vector	-2.14024	-3.83769	5.98532	-1.53713	1.06882	0.468311
WT	103.942	107.766	93.7896	103.667	92.4955	98.3412
D127K	19.2799	35.6545	24.0892	11.8083	9.51335	21.5277	14.8665
D131K	10.8132	24.7586	27.7855
D127AD131A	8.06684	19.0933	12.0335
D127A	110.953	112.945	106.384
D131A	101.474	101.055	93.7453
