# Supplementary material for: Electrostatic lateral interactions drive ESCRT-III heteropolymer assembly
Source: eLife. 2019 Jun 27;8:e46207. doi: 10.7554/eLife.46207 (PMC6663469; doi:10.7554/eLife.46207)
Supplement: Figure 3—source data 1. [file elife-46207-fig3-data1.xlsx]

## Sheet: Sheet1
% MVB Sorting
Snf7 D127K + Vps24 WT	21.7768	22.6733	17.5485
Snf7 D127K + Vps24 Q16E	40.2958	51.2854	49.9681	34.1609	45.7459
Snf7 D127K + Vps24 R19E	57.8641	55.247	34.2533	52.0954	48.3547
Snf7 D131K + Vps24 WT	10.8132	24.7586	27.7855
Snf7 D131K + Vps24 Q16E	66.9785	76.6028	65.1011
Snf7 D131K + Vps24 R19E	45.132	42.4833	43.36
Snf7 E142K + Vps24 WT	40.9096	42.1768	21.2491	32.5902	28.4577
Snf7 E142K + Vps24 Q16E	75.5387	81.797	56.9169	79.663	70.1225
Snf7 E142K + Vps24 R19E	66.5642	65.8722	72.119	73.7739	59.5772
