# Supplementary material for: Electrostatic lateral interactions drive ESCRT-III heteropolymer assembly
Source: eLife. 2019 Jun 27;8:e46207. doi: 10.7554/eLife.46207 (PMC6663469; doi:10.7554/eLife.46207)
Supplement: Figure 3—source data 2. [file elife-46207-fig3-data2.xlsx]

## Sheet: Sheet1
Vps24-HA % crosslinked
Vps24-WT-HA	1.81294	1.74242	1.17014
Vps24-Q16C-HA	5.15454	4.66089	4.56789
Vps24-R19C-HA	20.8725	24.3314	18.7638
Vps24-K26C-HA	24.8873	30.0944	17.4066
