# Supplementary material for: Electrostatic lateral interactions drive ESCRT-III heteropolymer assembly
Source: eLife. 2019 Jun 27;8:e46207. doi: 10.7554/eLife.46207 (PMC6663469; doi:10.7554/eLife.46207)
Supplement: Figure 4—source data 1. [file elife-46207-fig4-data1.xlsx]

## Sheet: Sheet1
% MVB Sorting
Vector	-0.00305285	0.182415	-0.000591354
WT	100.001	99.9912	99.2034
Snf7D131K	20.2868	22.646	22.6644
Snf7D131KR134D	86.8905	86.4861	89.4798
Snf7D131KR149D	94.1531	93.8824	99.3718
