# Supplementary material for: Electrostatic lateral interactions drive ESCRT-III heteropolymer assembly
Source: eLife. 2019 Jun 27;8:e46207. doi: 10.7554/eLife.46207 (PMC6663469; doi:10.7554/eLife.46207)
Supplement: Figure 6—source data 1. [file elife-46207-fig6-data1.xlsx]

## Sheet: Sheet1
% MVB Sorting
WT	100.16	99.8116	99.9846
Snf7131K	6.14468	12.1806	1.67294	37.5421	38.9642
Snf7D131K+Vector	-13.5583	13.3543	8.82102	-8.82119
Snf7D131K + Vps24-2fold	37.8122	4.61943	24.1726
Snf7D131K + Vps2-2fold	-2.51867	4.02086	11.608
Snf7D131K + Vps24-16fold	103.026	102.653	101.721
Snf7D131K + Vps2-16fold	101.524	98.7905	103.341
