# Supplementary material for: Electrostatic lateral interactions drive ESCRT-III heteropolymer assembly
Source: eLife journal article supplement (doi:10.7554/elife.46207), 2019-06-27
Supplement: supp [file elife-46207-supp-v1.zip]

# Snf7 R52E

Single-stranded filaments

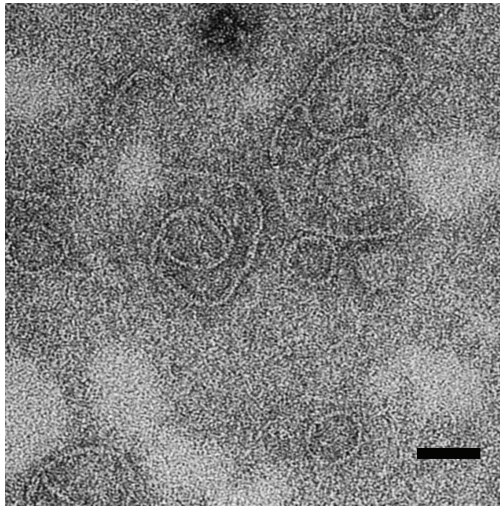

500 nM, 5 min

Lateral Bundles

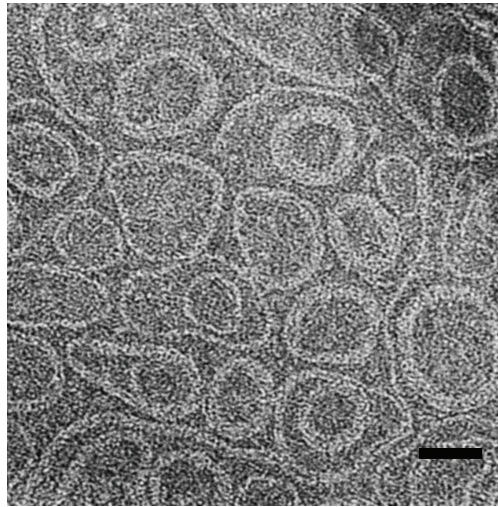

500 nM, 10 min

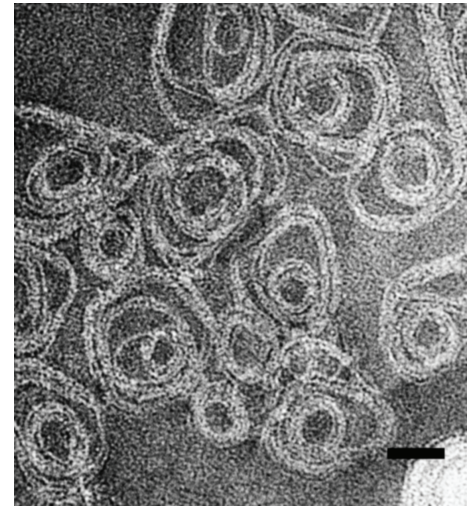

1 μM, 10 min

Bar 50 nm

Single-stranded filaments

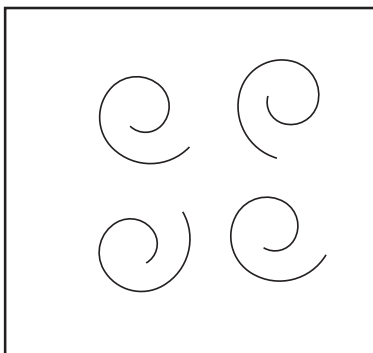

Time

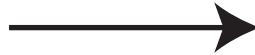

Lateral Bundles

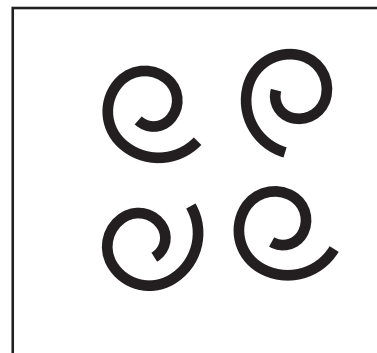

Figure 5 - Fig Supplement 3
