# Supplementary material for: Electrostatic lateral interactions drive ESCRT-III heteropolymer assembly
Source: eLife journal article supplement (doi:10.7554/elife.46207), 2019-06-27
Supplement: supp [file elife-46207-supp-v1.zip]

A.

[Vps24 R19C -HA] + Snf7 mutants

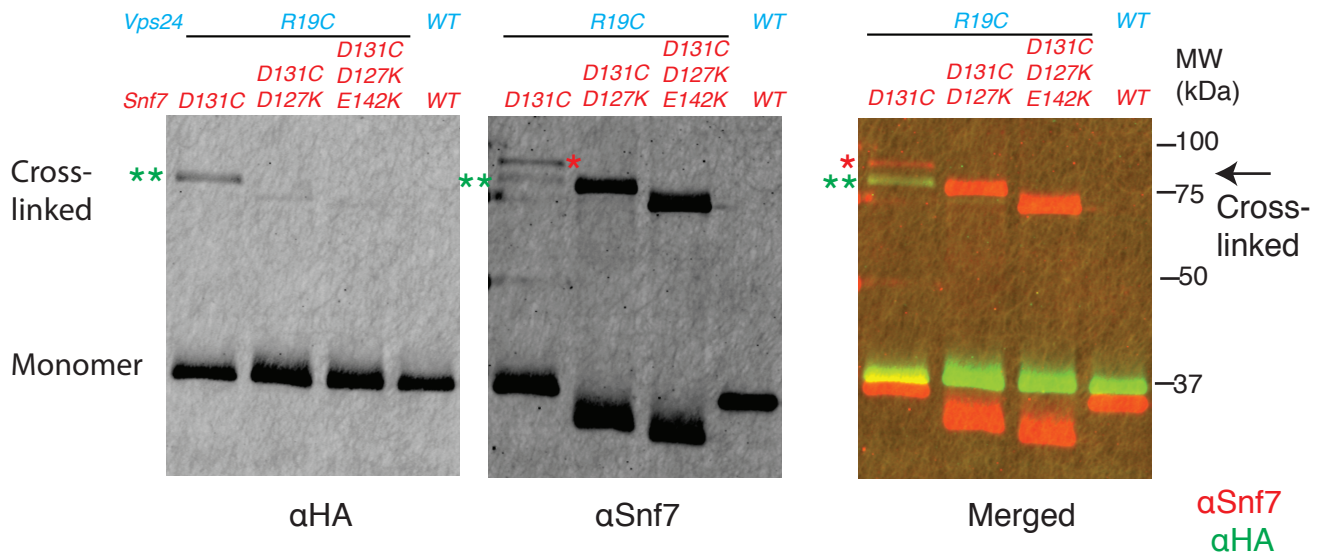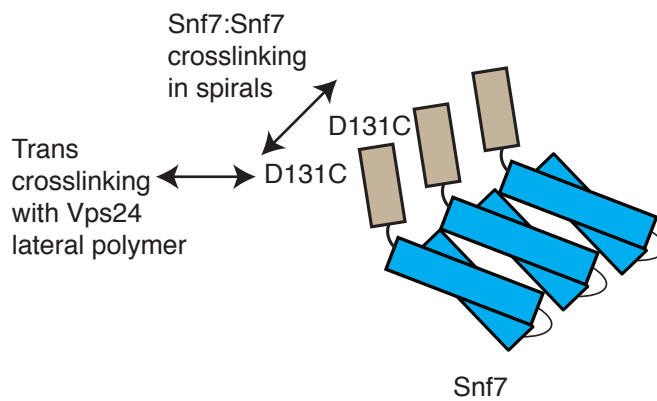

\*Snf7:Snf7 crosslink  
\*\*Snf7:Vps24 crosslink

B.

Snf7D131C + [Vps24 (mut)-HA]

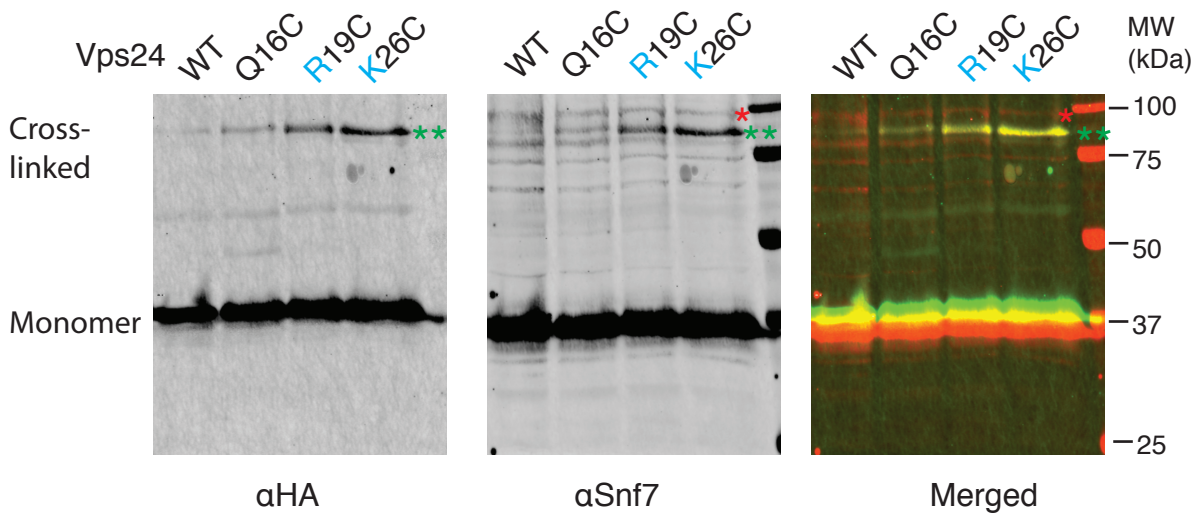

αSnf7  
αHA  
\*Snf7:Snf7 crosslink  
\*\*Snf7:Vps24 crosslink

Figure 3 - Fig Supplement 2
