# Supplementary material for: Electrostatic lateral interactions drive ESCRT-III heteropolymer assembly
Source: eLife journal article supplement (doi:10.7554/elife.46207), 2019-06-27
Supplement: supp [file elife-46207-supp-v1.zip]

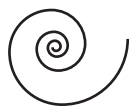

Flat Spirals

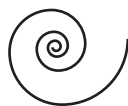

Flat Spirals

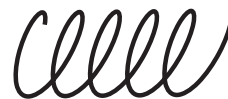

3D Spirals (Helices)

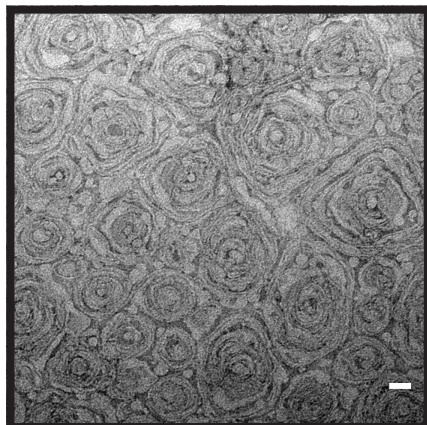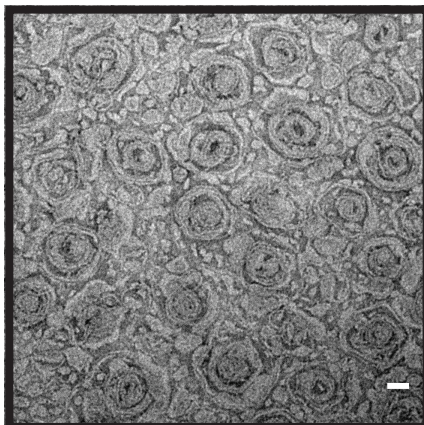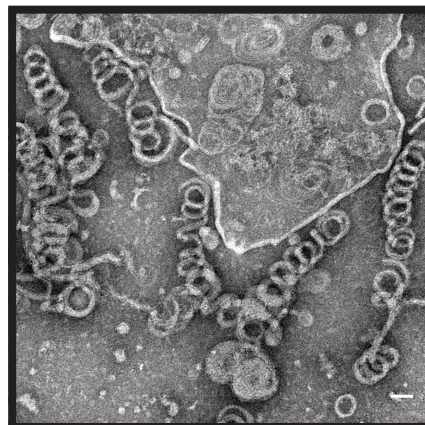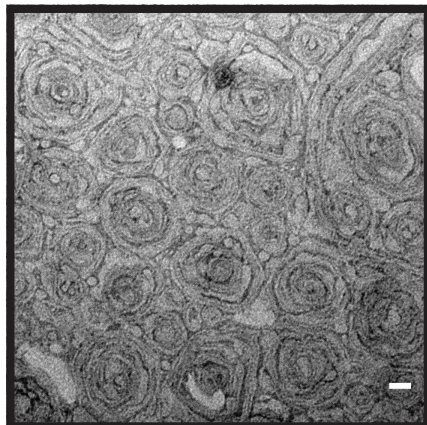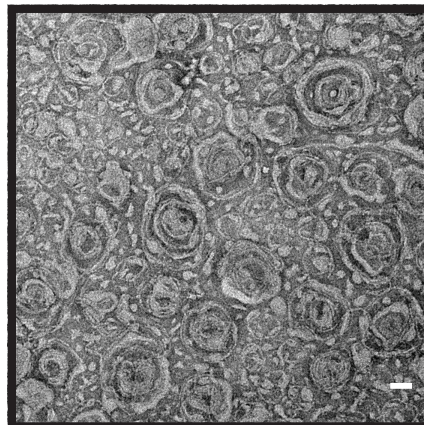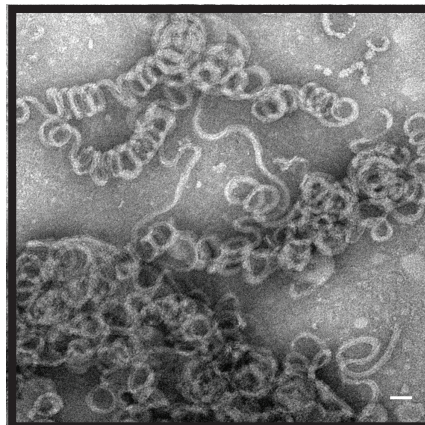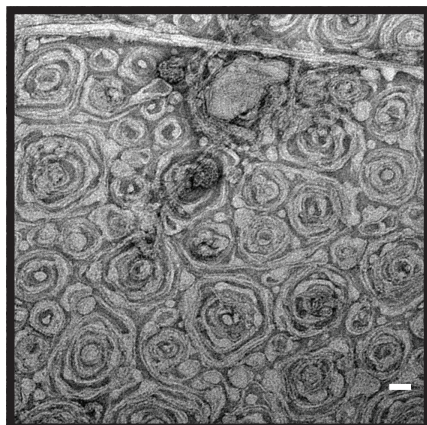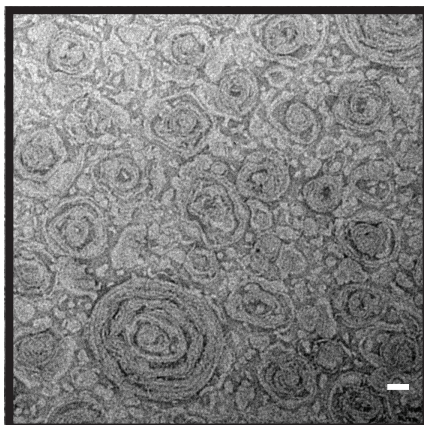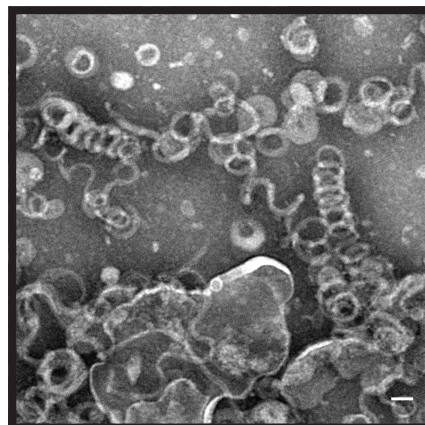

Snf7-R52E

Snf7-R52E + Vps24

Snf7-R52E + Vps24+Vps2

Bar 50 nm

1  $\mu$ M each, 10 minutes on Monolayers

Figure 5 - Fig Supplement 1
