# Supplementary material for: Electrostatic lateral interactions drive ESCRT-III heteropolymer assembly
Source: eLife journal article supplement (doi:10.7554/elife.46207), 2019-06-27
Supplement: supp [file elife-46207-supp-v1.zip]

A.

Positive Curvature

Negative Curvature

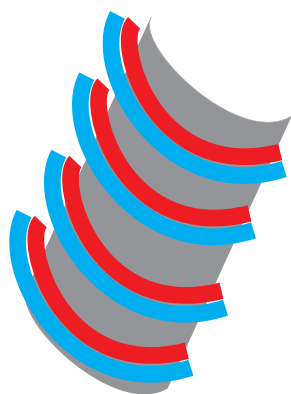

Creates tubules

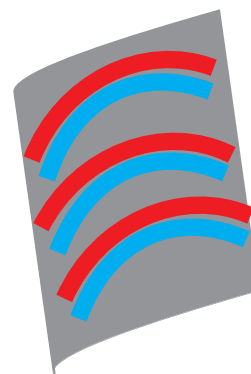

Creates invaginations

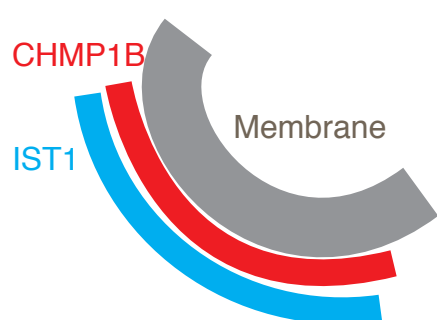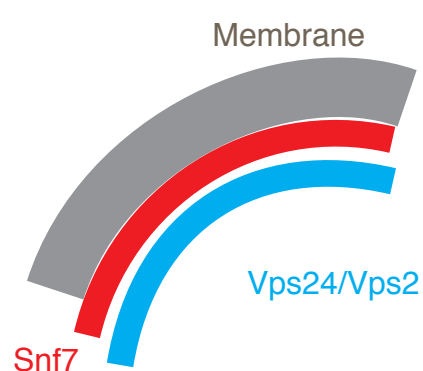

B.

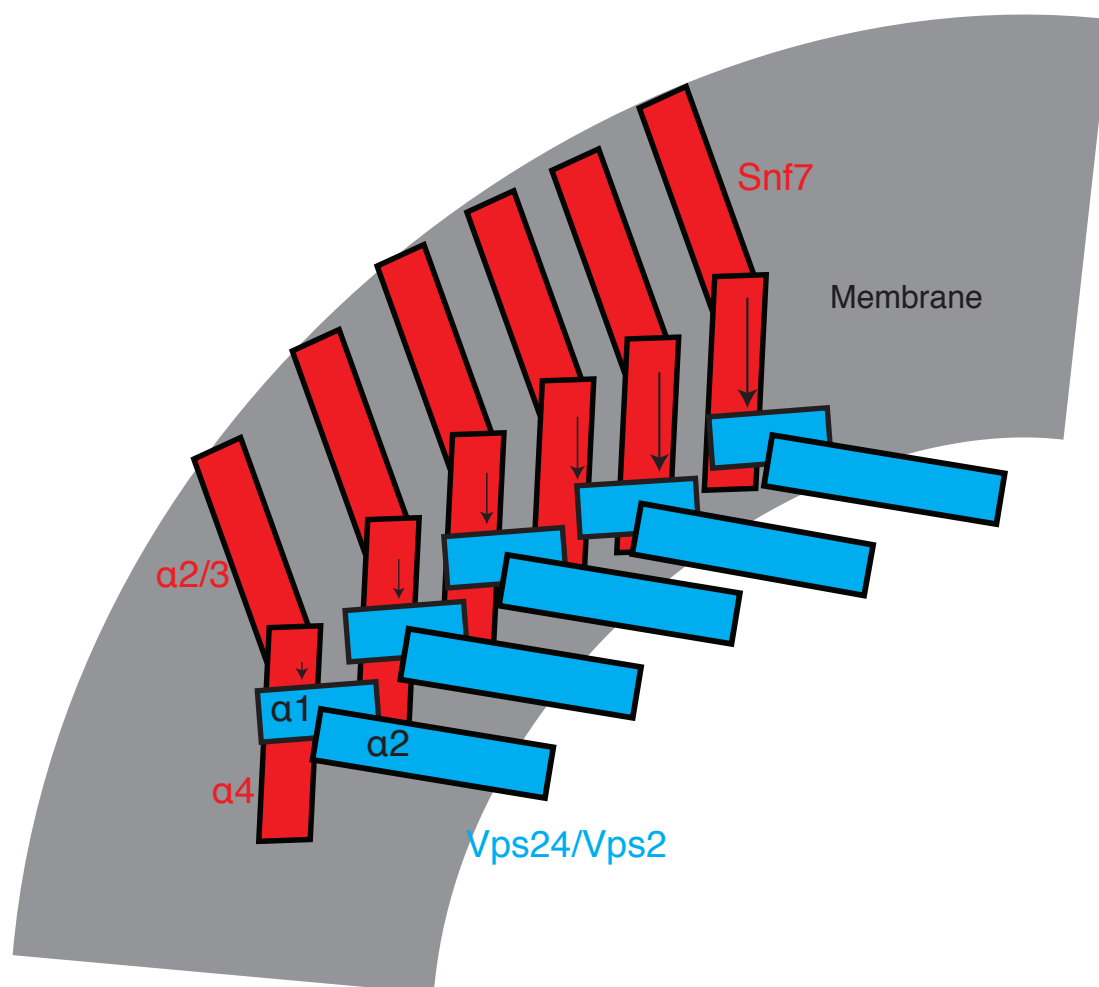

Figure 8 - Fig. Supp. 1
