# Supplementary material for: Electrostatic lateral interactions drive ESCRT-III heteropolymer assembly
Source: eLife journal article supplement (doi:10.7554/elife.46207), 2019-06-27
Supplement: supp [file elife-46207-supp-v1.zip]

A.

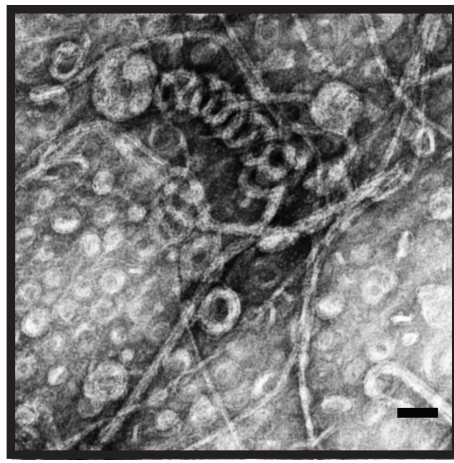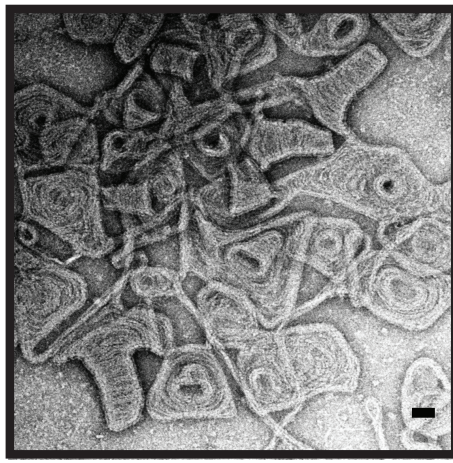

10 min  
on monolayers

7  $\mu$ M Snf7 R52E + 1.5  $\mu$ M Vps24

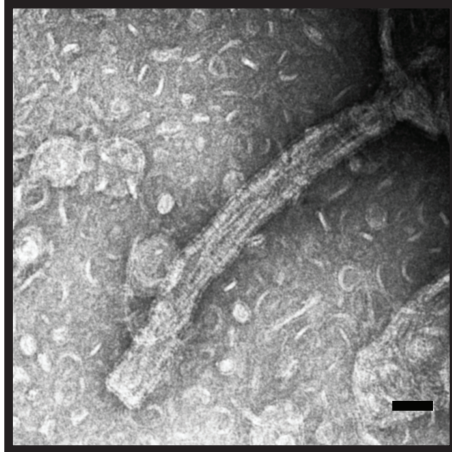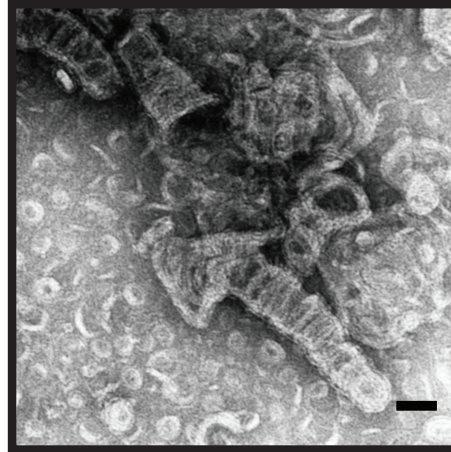

10 min  
on monolayers

7  $\mu$ M Snf7 R52E + 3  $\mu$ M Vps24    7  $\mu$ M Snf7 R52E + 3  $\mu$ M Vps24  
+ 3  $\mu$ M Vps2    Bar 50 nm

B.

1 hour on monolayers

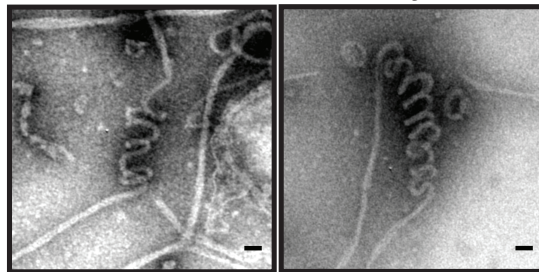

7  $\mu$ M Snf7 R52E

Bar 50 nm

C.

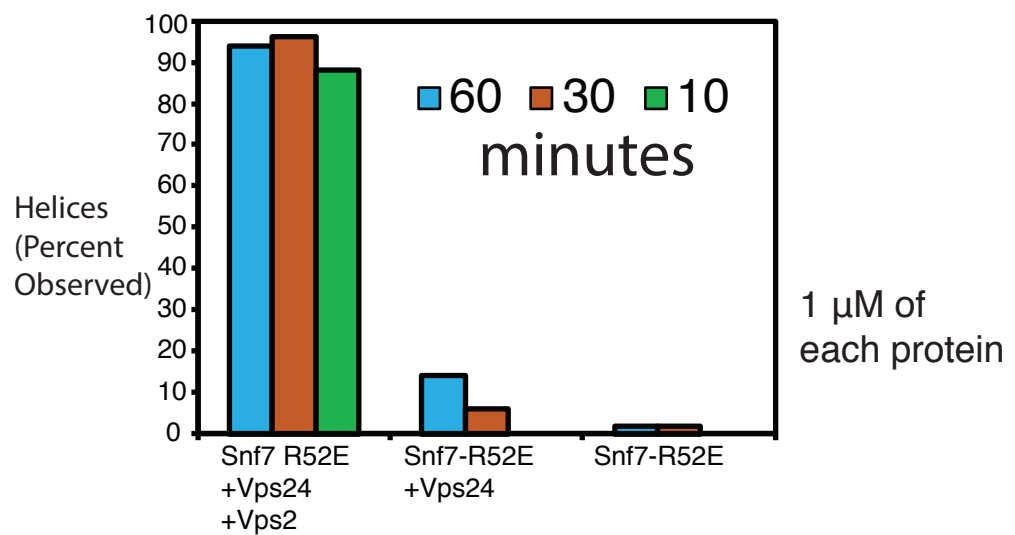

Figure 5 - Fig Supplement 2
