# Supplementary figures and images for: Electrostatic lateral interactions drive ESCRT-III heteropolymer assembly
Source: eLife journal article supplement (doi:10.7554/elife.46207), 2019-06-27

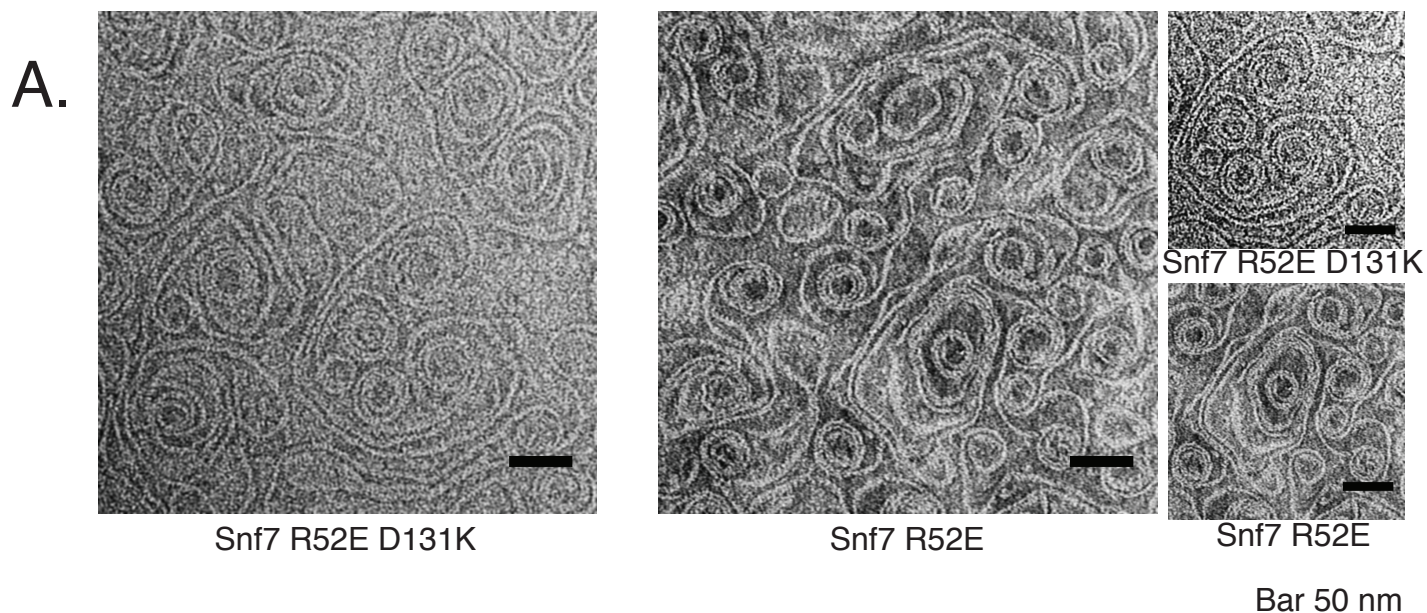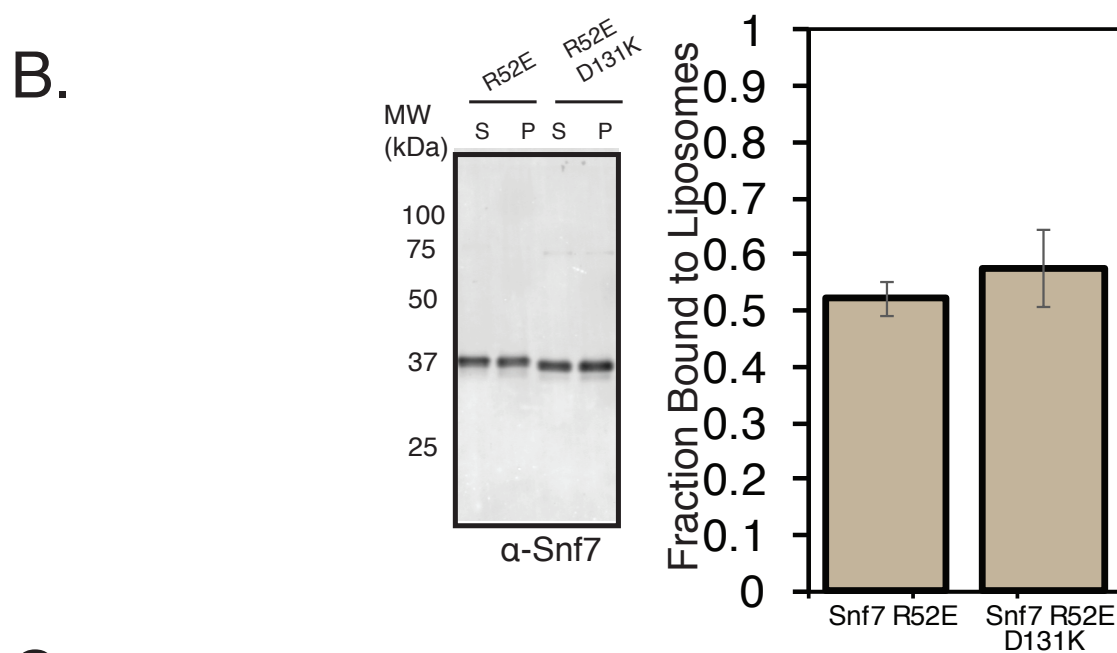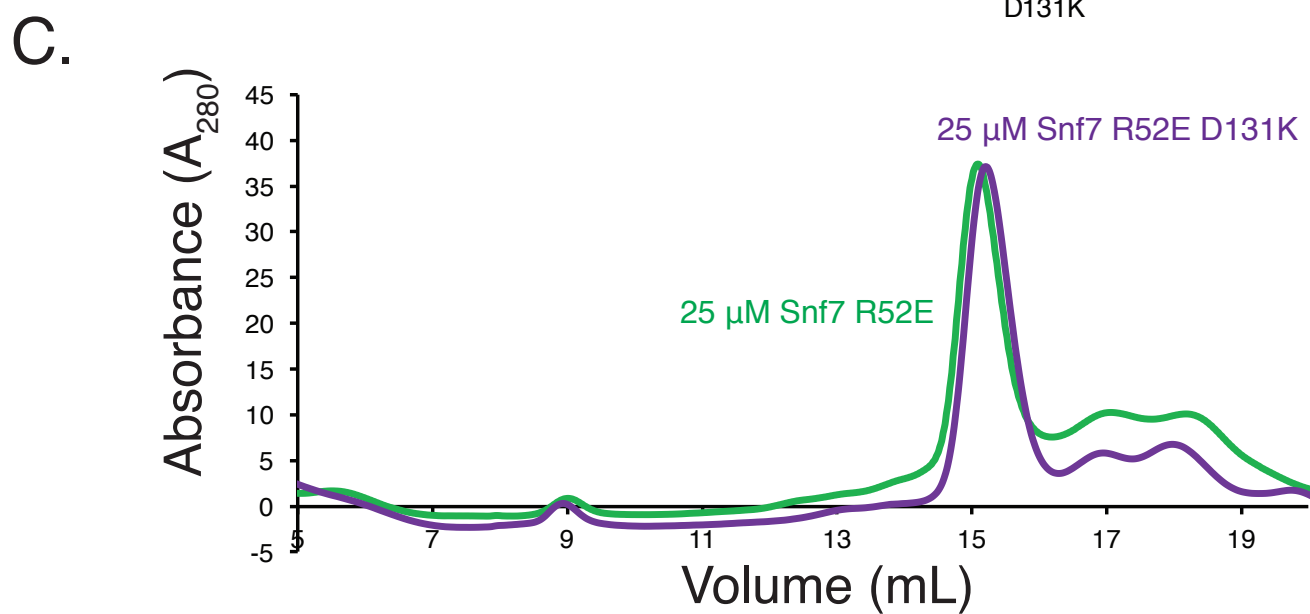

Figure 1- Fig Supplement 4

Supplement: supp [file elife-46207-supp-v1.zip]

A.

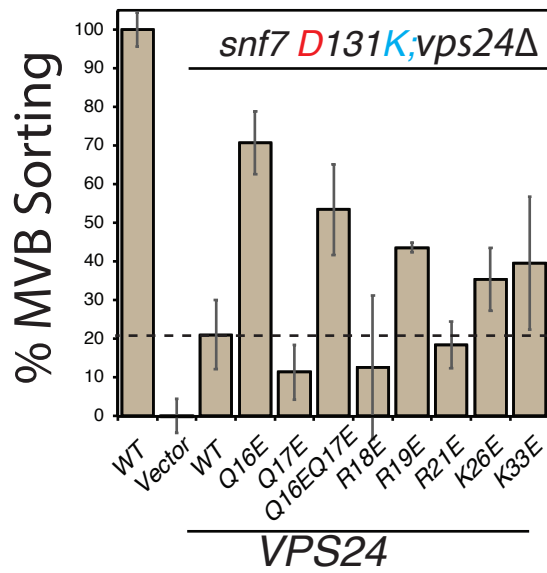

B.

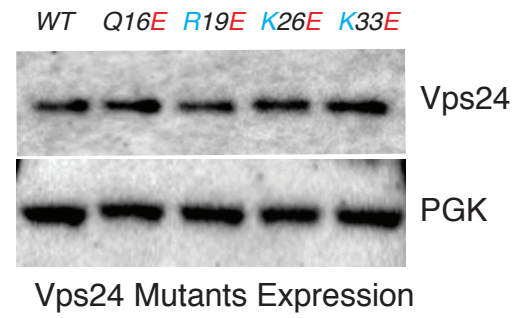

C.

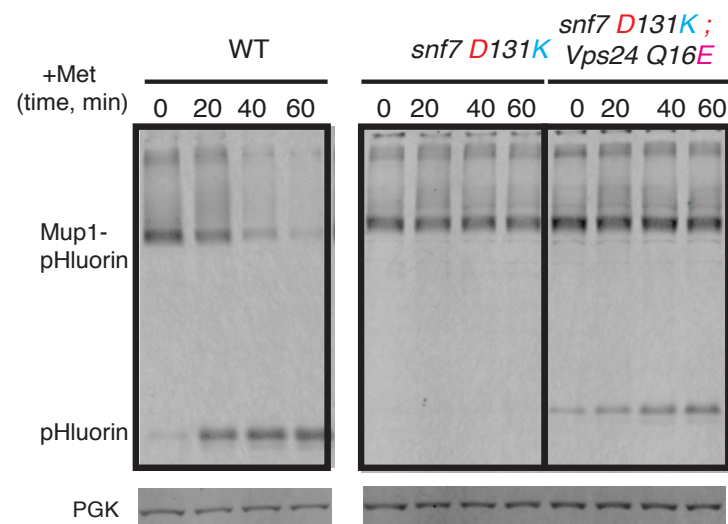

Figure 3 - Fig Supplement 1

Supplement: supp [file elife-46207-supp-v1.zip]

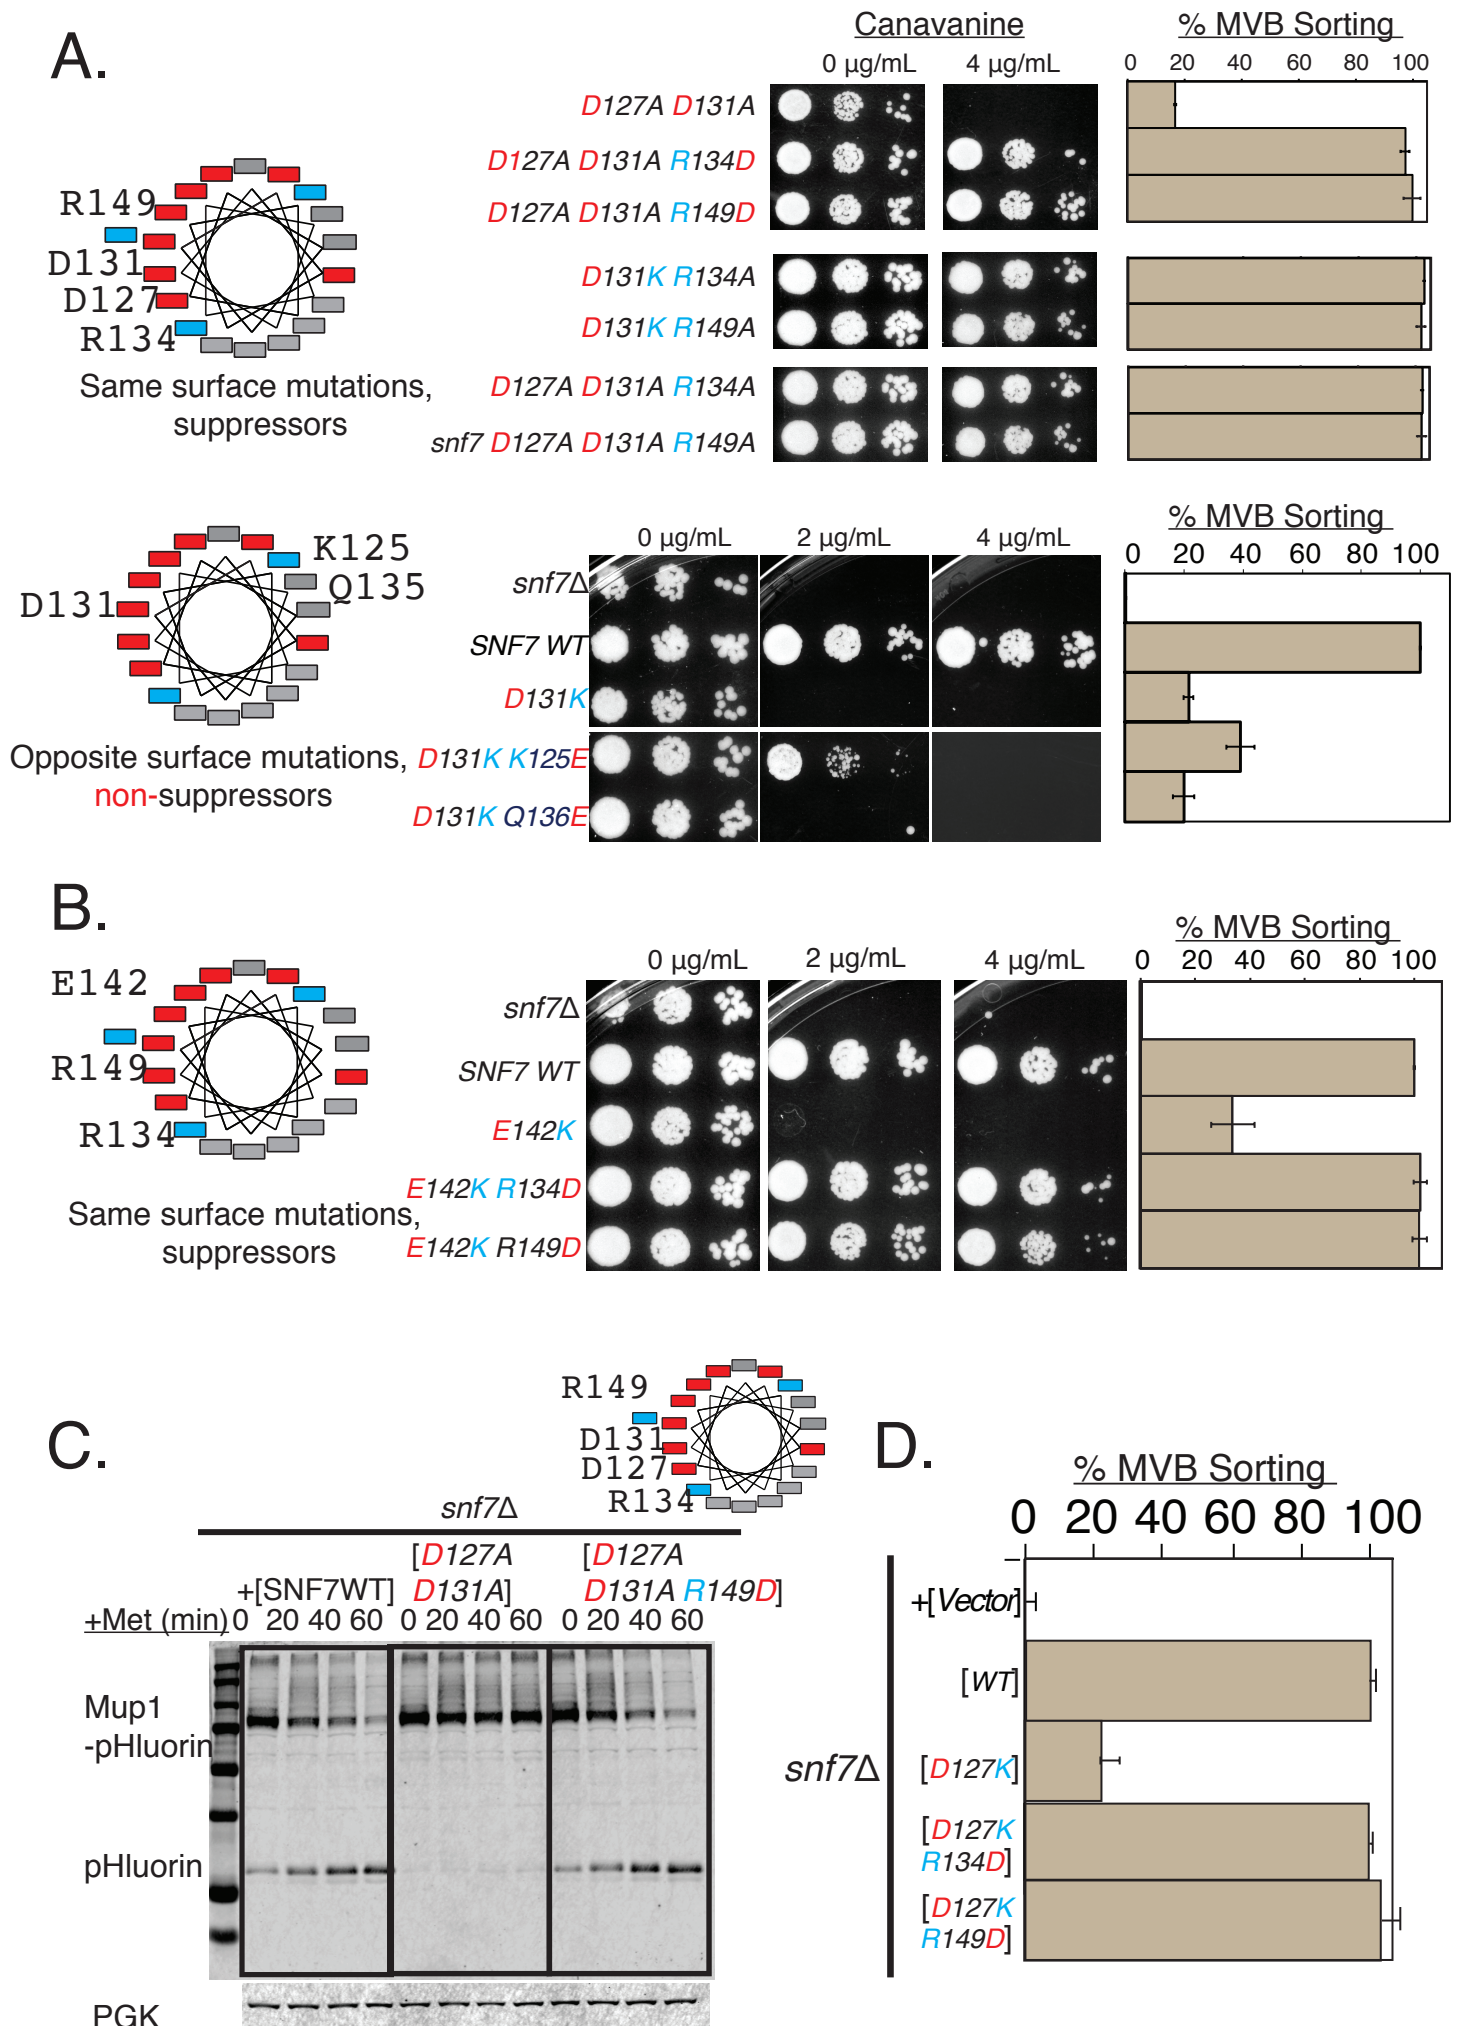

Figure 4 - Fig Supplement 1

Supplement: supp [file elife-46207-supp-v1.zip]

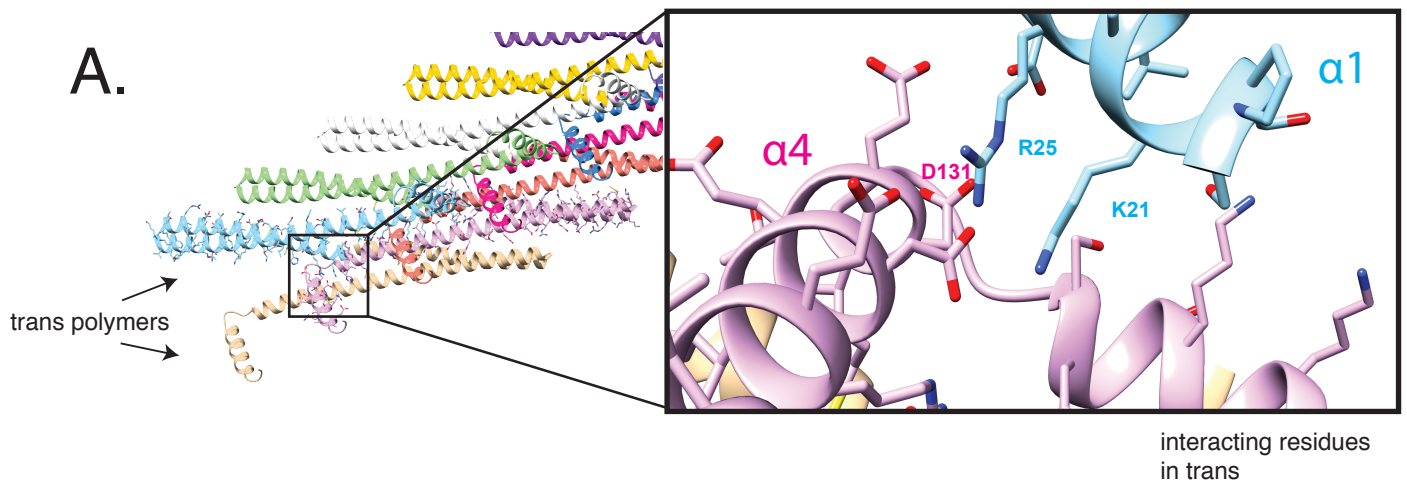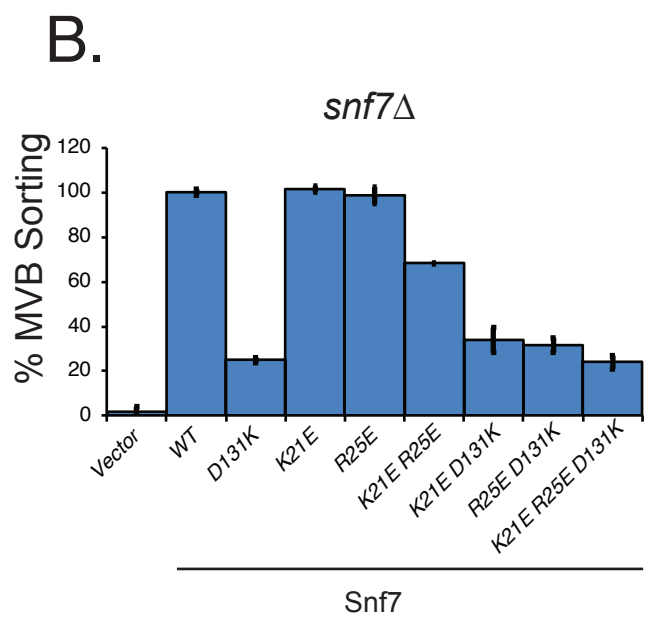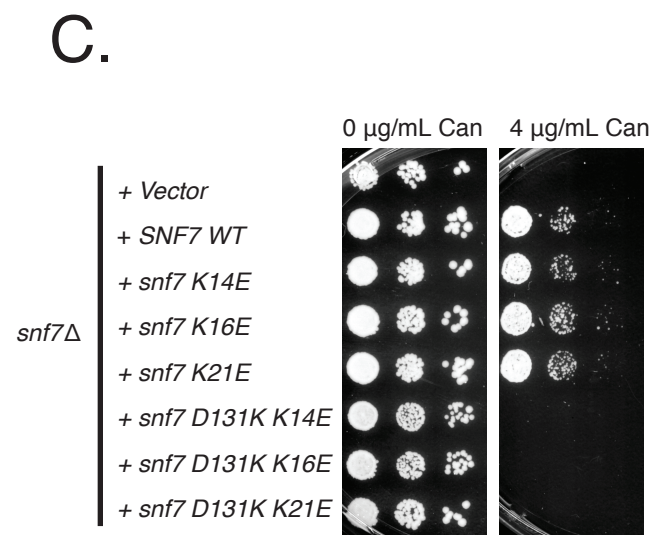

Figure 2 - Fig Supplement 1

Supplement: supp [file elife-46207-supp-v1.zip]

A.

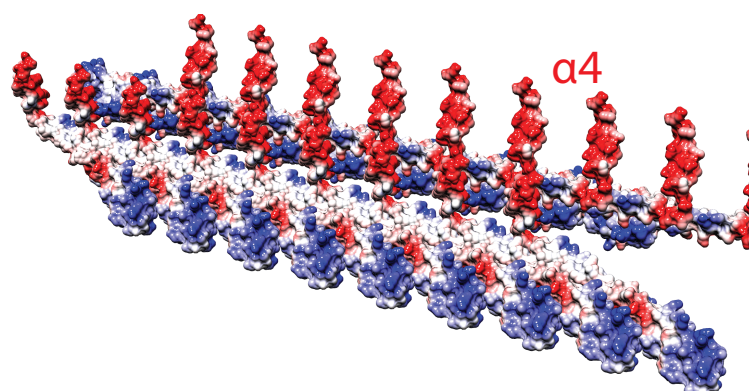

B.

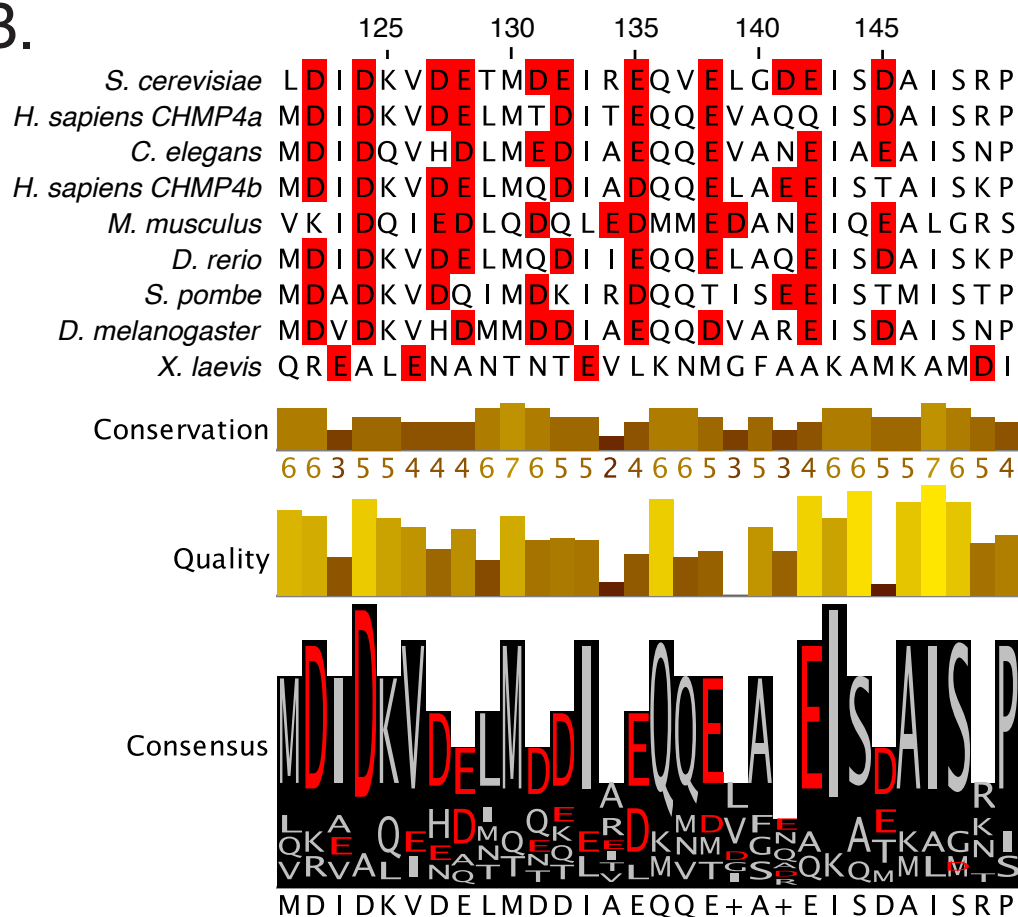

Figure 1- Fig Supplement 1

Supplement: supp [file elife-46207-supp-v1.zip]

A.

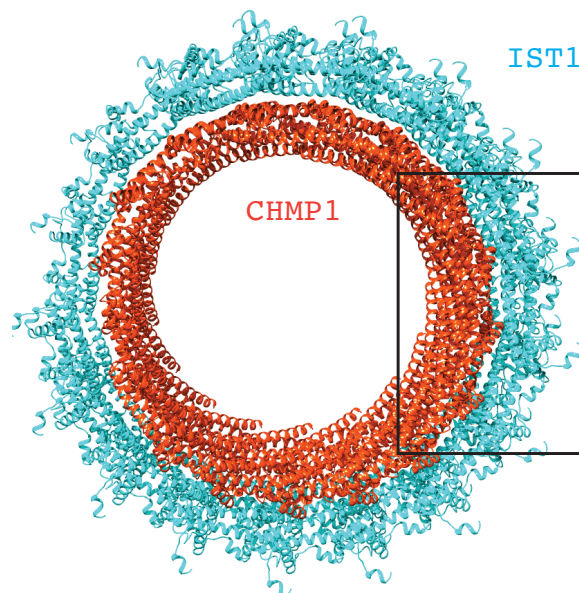

B.

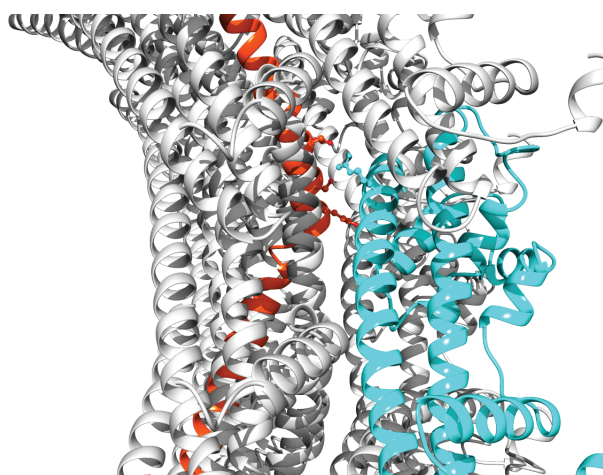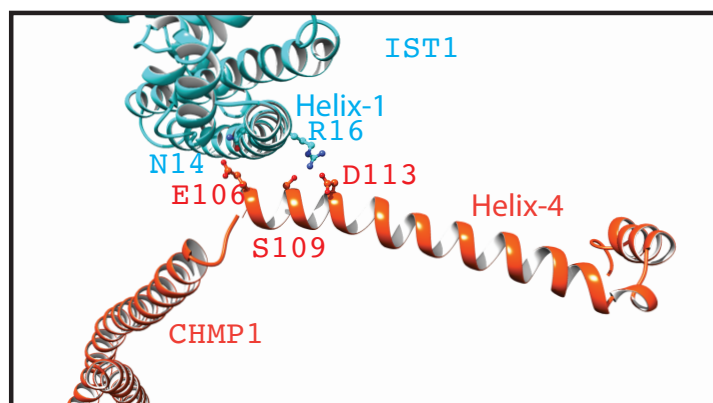

C.

|        |                      |    |     |
|--------|----------------------|----|-----|
|        | 104                  |    | 123 |
| hCHMP1 | NLEKISALMDKFEHQFETLD |    |     |
|        | ⋮⋮⋮⋮                 | ⋮⋮ | ⋮⋮  |
| ySnf7  | DIDKVDETMDEIREQVELGD |    |     |
|        | 122                  |    | 141 |

D.

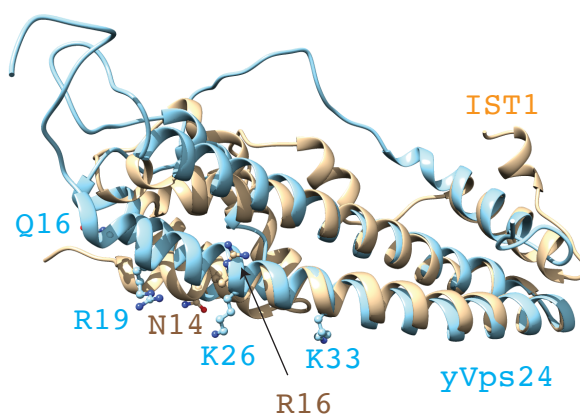

Figure 2 - Fig Supplement 3

Supplement: supp [file elife-46207-supp-v1.zip]

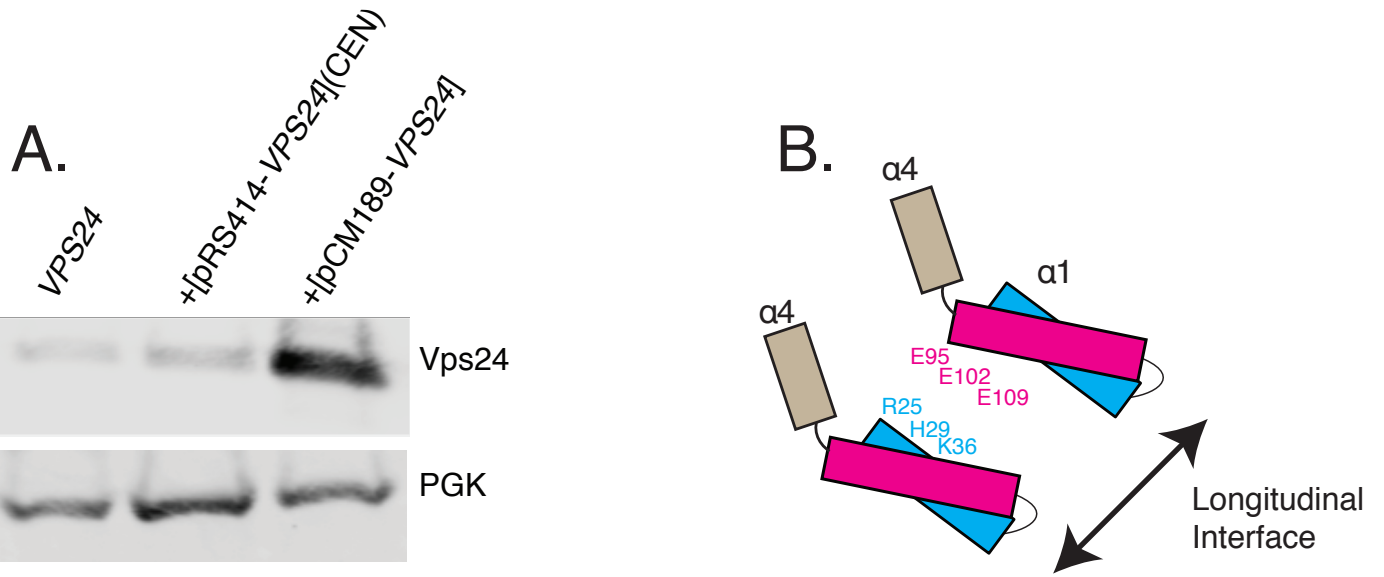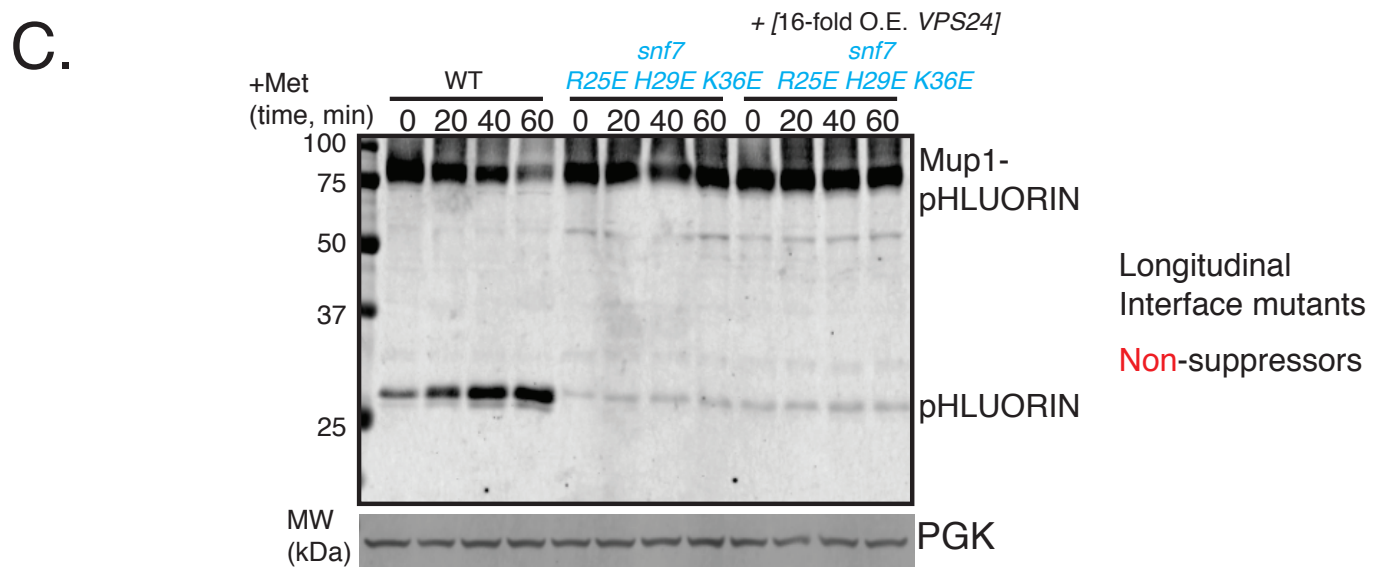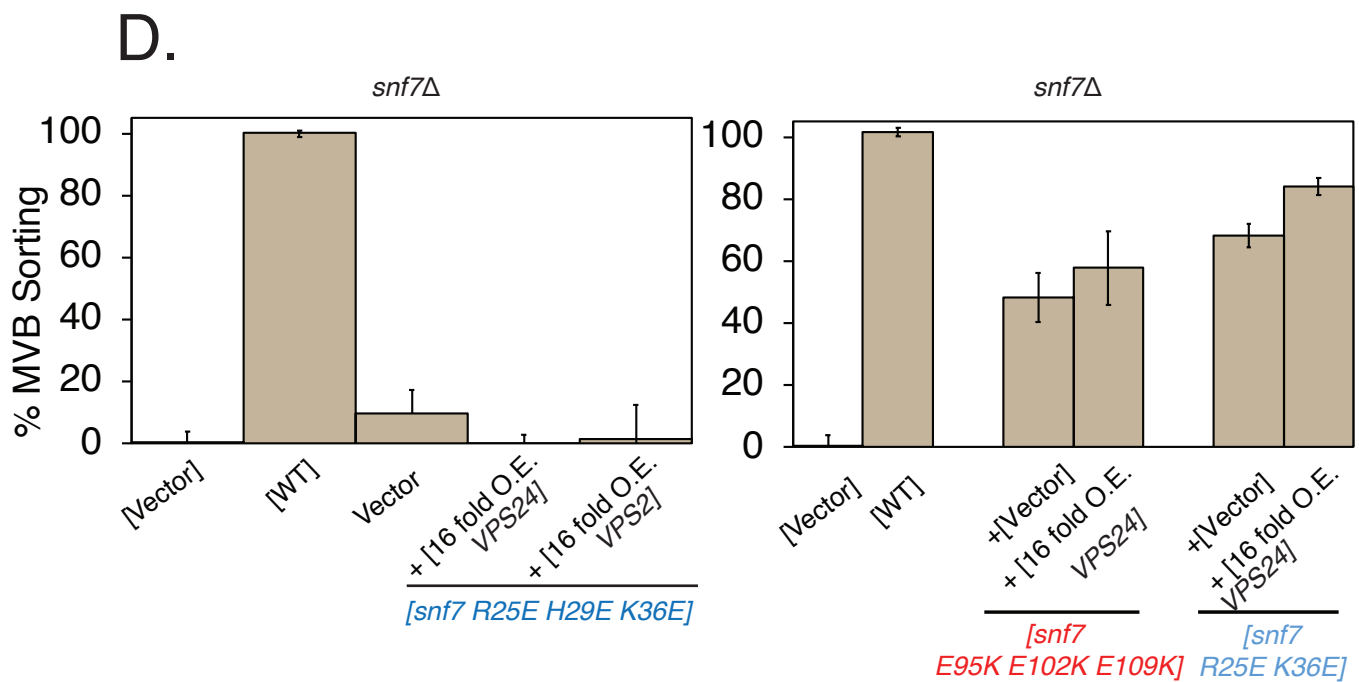

Figure 6 - Fig Supplement 1

Supplement: supp [file elife-46207-supp-v1.zip]

# Snf7 helix-4 (charge) mutants

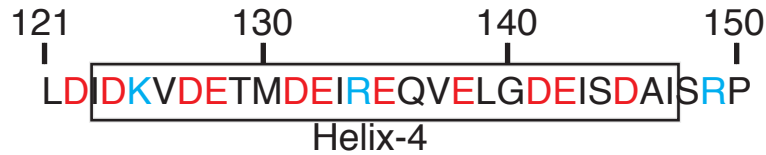

A.

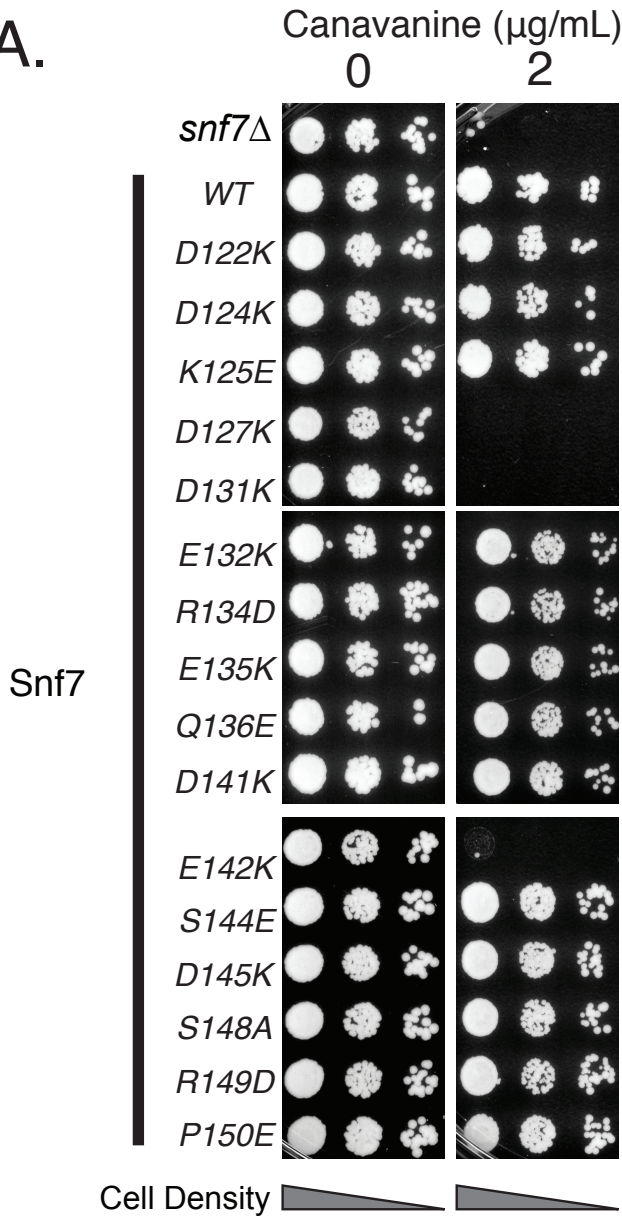

B.

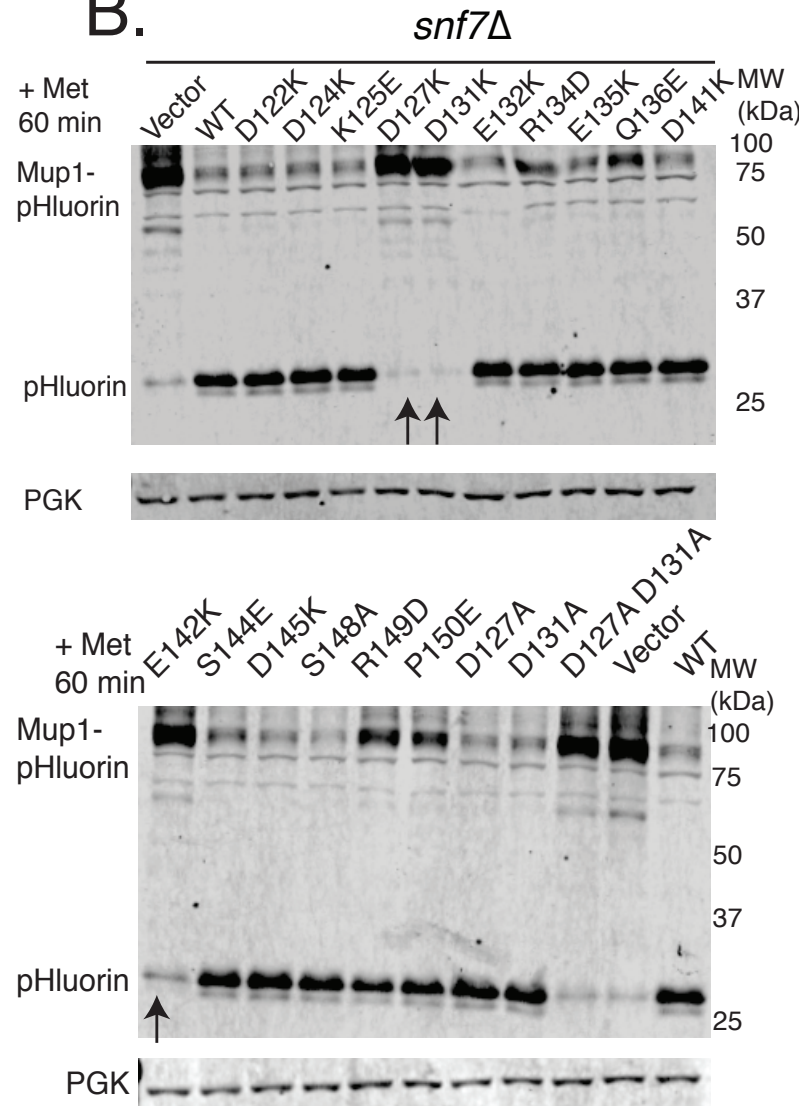

C.

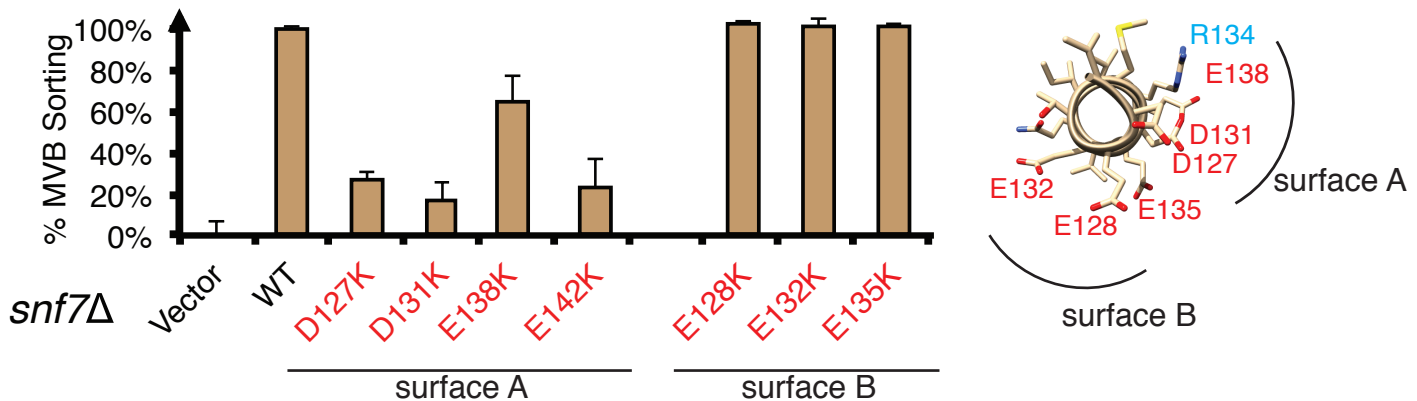

Figure 1 - Fig Supplement 2

Supplement: supp [file elife-46207-supp-v1.zip]

Vps20  
Snf7-R52E  
Vps24  
Vps2

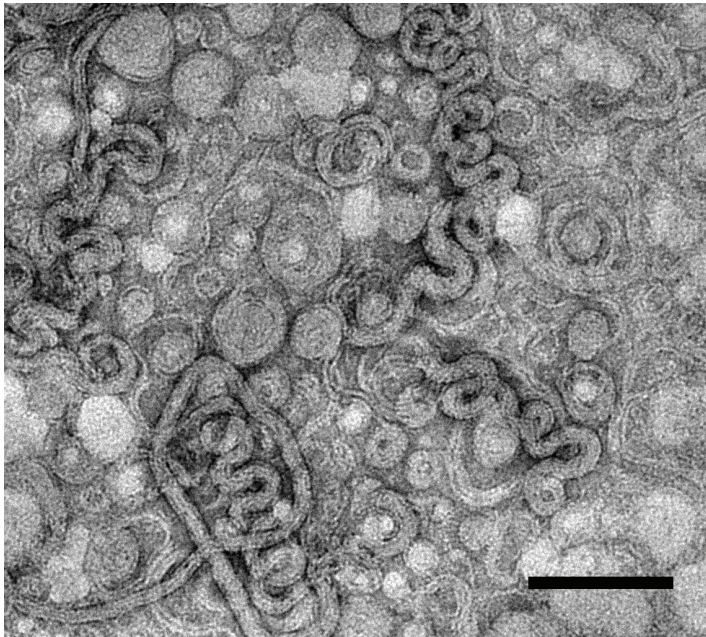

Bar 200 nm

GSTVps25  
Vps20  
Snf7(WT)  
Vps24  
Vps2

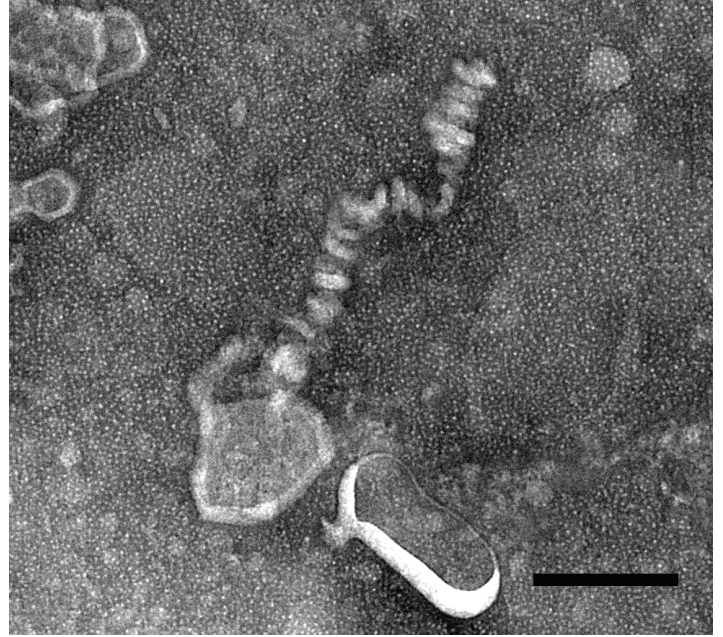

Bar 200 nm

Figure 5 - Fig Supplement 4

Supplement: supp [file elife-46207-supp-v1.zip]

A.

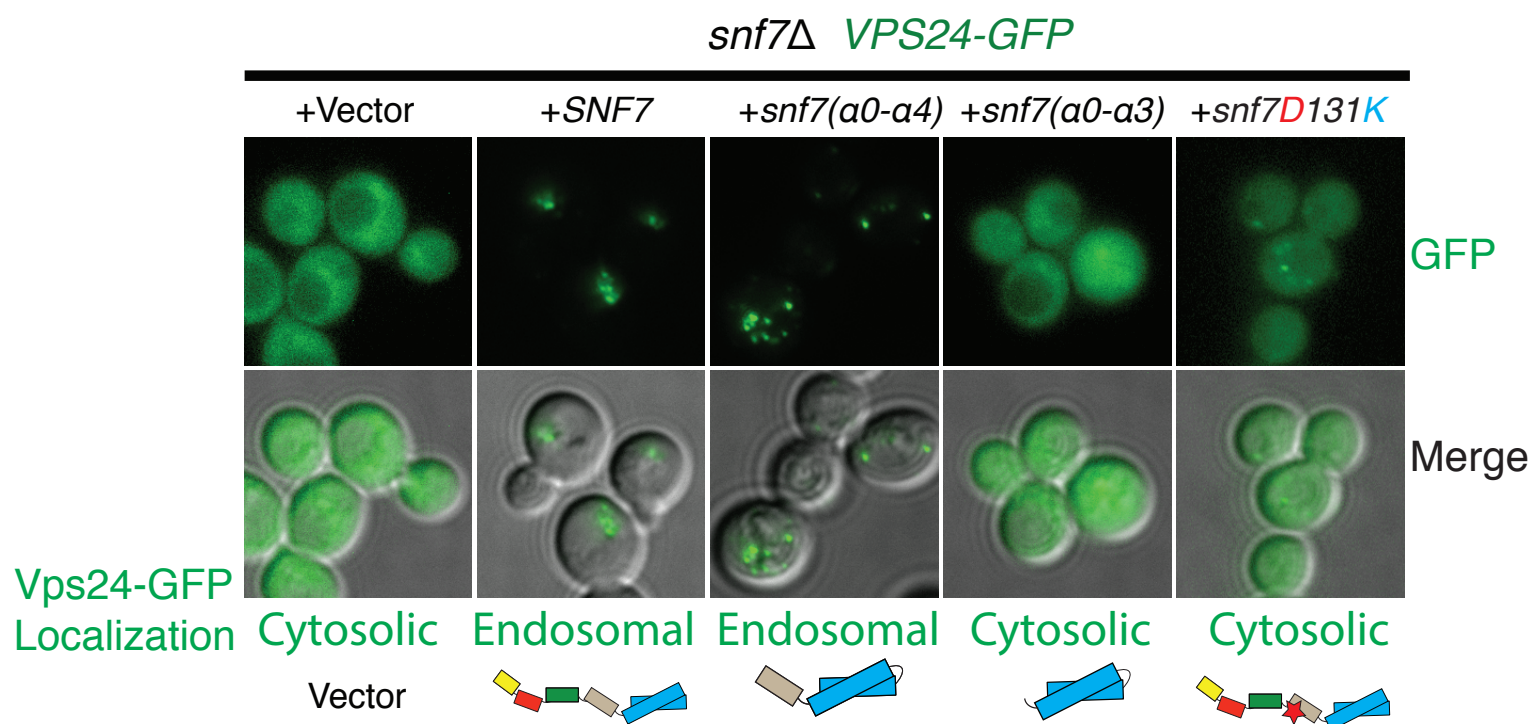

B.

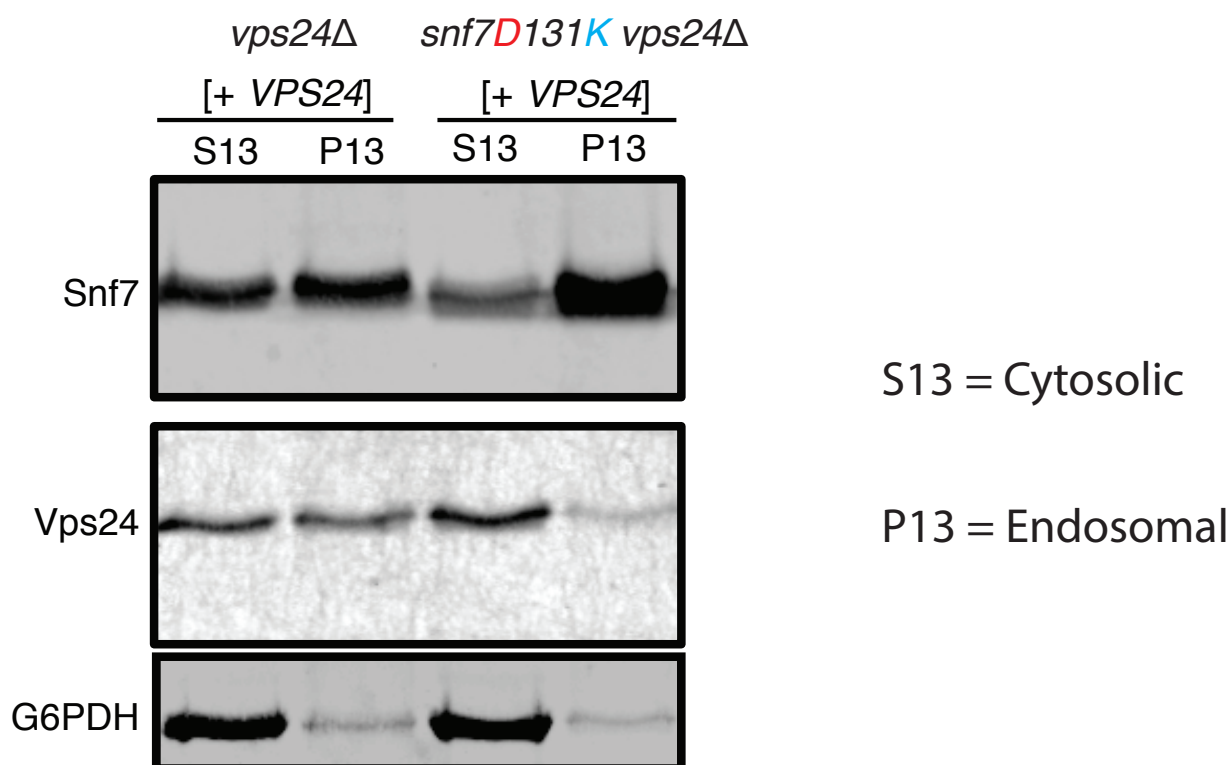

Figure 2 - Fig Supplement 2

Supplement: supp [file elife-46207-supp-v1.zip]

A.

## Can1 Assay

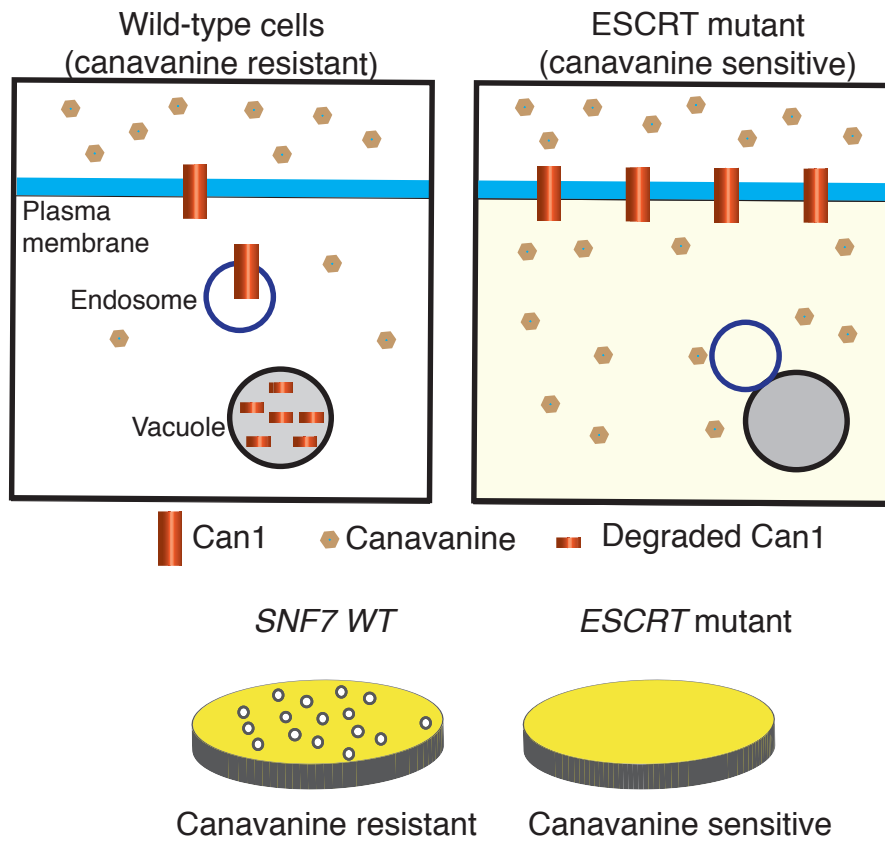

## Mup1 Assay

B.

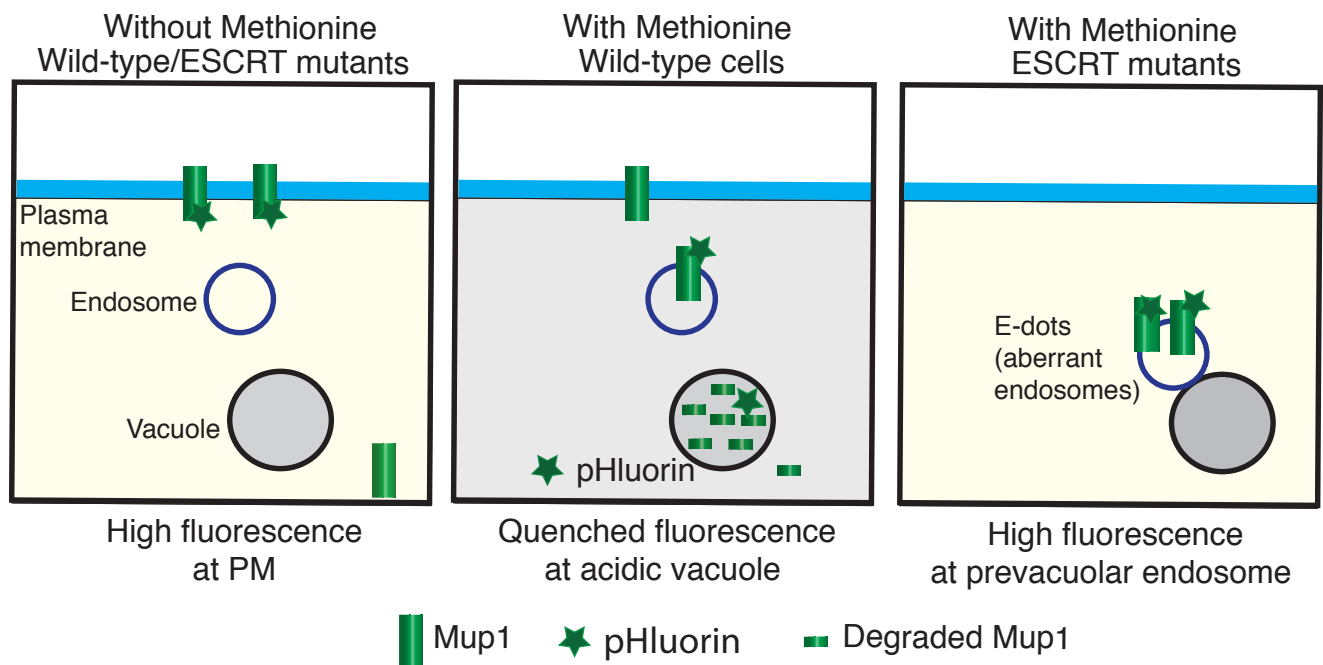

Figure 1 - Fig Supplement 3

Supplement: supp [file elife-46207-supp-v1.zip]
